# Supplementary material for: Inter-species comparison of the copepodite stage morphology, vertical distribution, and seasonal population structure of five sympatric mesopelagic aetideid copepods in the western Arctic Ocean
Source: Frontiers journal article supplement (doi:10.3389/fmars.2022.943100), 2022-08-19
Supplement: Table_1.XLSX [file Table_1.XLSX]

## Sheet: Sheet1
		Supplementary Table 1. Data on prosome length (PL), cephalosome width around the antenna (CWA2), cephalosome width around the mandible (CWMd), prosome width (PW), and CWA2: CWMd of C6F stage of five sympatric Aetideidae copepods observed for SHEBA ice station in the western Arctic Ocean. Values represent mean±sd and ranges in the parentheses.
				Length (mm)
		Species		PL	CWA2	CWMd	PW	CWA2: CWMd
		Chiridius		3.08 ± 0.06	1.19 ± 0.03	1.18 ± 0.03	1.26 ± 0.02	1.01 ± 0.01
			obtusifrons	(2.99–3.16)	(1.16–1.26)	(1.15–1.24)	(1.23–1.30)	(1.00–1.03)
		Gaetanus		3.20 ± 0.09	1.02 ± 0.04	1.10 ± 0.04	1.26 ± 0.06	0.92 ± 0.02
			tenuispinus	(3.06–3.33)	(0.92–1.08)	(1.01–1.16)	(1.16–1.35)	(0.90–0.94)
		Gaetanus		3.83 ± 0.09	1.36 ± 0.04	1.45 ± 0.04	1.5 ± 0.04	0.94 ± 0.01
			brevispinus	(3.63–3.97)	(1.29–1.41)	(1.37–1.51)	(1.43–1.57)	(0.91–0.95)
		Aetideopsis		2.64 ± 0.10	1.01 ± 0.05	0.99 ± 0.05	1.05 ± 0.06	1.02 ± 0.01
			multiserrata	(2.45–2.80)	(0.90–1.10)	(0.88–1.09)	(0.95–1.13)	(1.01–1.03)
		Aetideopsis		3.34 ± 0.07	1.26 ± 0.03	1.23 ± 0.03	1.21 ± 0.04	1.02 ± 0.01
			rostrata	(3.20–3.46)	(1.20–1.31)	(1.17–1.28)	(1.14–1.27)	(1.01–1.03)
