# Supplementary material for: Inter-species comparison of the copepodite stage morphology, vertical distribution, and seasonal population structure of five sympatric mesopelagic aetideid copepods in the western Arctic Ocean
Source: Frontiers journal article supplement (doi:10.3389/fmars.2022.943100), 2022-08-19
Supplement: Table_2.XLSX [file Table_2.XLSX]

## Sheet: Sheet1
		Supplementary Table 2. Data on prosome length (PL), cephalosome width around the antenna (CWA2), cephalosome width around the mandible (CWMd), prosome width (PW), and CWA2: CWMd of C6M stage of five sympatric Aetideidae copepods observed for SHEBA ice station in the western Arctic Ocean. Values represent mean±sd and ranges in the parentheses.
				Length (mm)
		Species		PL	CWA2	CWMd	PW	CWA2: CWMd
		Chiridius		2.30 ± 0.05	0.82 ± 0.02	0.85 ± 0.02	0.94 ± 0.04	0.97 ± 0.01
			obtusifrons	(2.23–2.38)	(0.78–0.86)	(0.80–0.89)	(0.87–1.00)	(0.95–0.98)
		Gaetanus		2.73 ± 0.07	0.79 ± 0.02	0.83 ± 0.03	1.05 ± 0.04	0.94 ± 0.02
			tenuispinus	(2.60–2.82)	(0.74–0.81)	(0.80–0.88)	(1.00–1.12)	(0.90–0.98)
		Gaetanus		3.07 ± 0.06	1.00 ± 0.05	1.09 ± 0.03	1.18 ± 0.04	0.91 ± 0.04
			brevispinus	(2.94–3.15)	(0.89–1.04)	(1.04–1.12)	(1.12–1.25)	(0.84–0.98)
		Aetideopsis		2.18 ± 0.04	0.80 ± 0.04	0.81 ± 0.04	0.82 ± 0.05	0.99 ± 0.01
			multiserrata	(2.10–2.24)	(0.73–0.85)	(0.73–0.84)	(0.71–0.88)	(0.96–1.01)
		Aetideopsis		3.34 ± 0.11	1.12 ± 0.04	1.19 ± 0.04	1.22 ± 0.05	0.94 ± 0.01
			rostrata	(3.16–3.43)	(1.06–1.16)	(1.13–1.23)	(1.14–1.28)	(0.93–0.96)
