# Supplementary material for: Inter-species comparison of the copepodite stage morphology, vertical distribution, and seasonal population structure of five sympatric mesopelagic aetideid copepods in the western Arctic Ocean
Source: Frontiers journal article supplement (doi:10.3389/fmars.2022.943100), 2022-08-19
Supplement: Table_3.XLSX [file Table_3.XLSX]

## Sheet: Sheet1
		Supplementary Table 3. Data on prosome length (PL), cephalosome width around the antenna (CWA2), cephalosome width around the mandible (CWMd), prosome width (PW), and CWA2: CWMd of C5F stage of five sympatric Aetideidae copepods observed for SHEBA ice station in the western Arctic Ocean. Values represent mean±sd and ranges in the parentheses.
				Length (mm)
		Species		PL	CWA2	CWMd	PW	CWA2: CWMd
		Chiridius		2.36 ± 0.03	0.91 ± 0.04	0.89 ± 0.03	0.97 ± 0.05	1.03 ± 0.01
			obtusifrons	(2.30–2.39)	(0.86–0.96)	(0.84–0.93)	(0.88–1.04)	(1.01–1.05)
		Gaetanus		2.52 ± 0.09	0.77 ± 0.05	0.80 ± 0.05	0.9 ± 0.07	0.96 ± 0.02
			tenuispinus	(2.39–2.68)	(0.64–0.84)	(0.68–0.85)	(0.83–1.06)	(0.94–0.99)
		Gaetanus		3.12 ± 0.04	1.07 ± 0.01	1.11 ± 0.02	1.20 ± 0.03	0.96 ± 0.01
			brevispinus	(3.05–3.17)	(1.05–1.09)	(1.07–1.14)	(1.15–1.24)	(0.94–0.98)
		Aetideopsis		2.08 ± 0.07	0.83 ± 0.03	0.80 ± 0.02	0.79 ± 0.04	1.04 ± 0.01
			multiserrata	(2.00–2.16)	(0.79–0.88)	(0.76–0.85)	(0.72–0.86)	(1.03–1.07)
		Aetideopsis		2.64 ± 0.19	1.02 ± 0.08	0.97 ± 0.08	0.93 ± 0.07	1.04 ± 0.02
			rostrata	(2.58–2.72)	(0.98–1.04)	(0.95–1.01)	(0.86–0.98)	(1.02–1.07)
