# Supplementary material for: Inter-species comparison of the copepodite stage morphology, vertical distribution, and seasonal population structure of five sympatric mesopelagic aetideid copepods in the western Arctic Ocean
Source: Frontiers journal article supplement (doi:10.3389/fmars.2022.943100), 2022-08-19
Supplement: Table_4.XLSX [file Table_4.XLSX]

## Sheet: Sheet1
		Supplementary Table 4. Data on prosome length (PL), cephalosome width around the antenna (CWA2), cephalosome width around the mandible (CWMd), prosome width (PW), and CWA2: CWMd of C5M stage of five sympatric Aetideidae copepods observed for SHEBA ice station in the western Arctic Ocean. Values represent mean±sd and ranges in the parentheses.
				Length (mm)
		Species		PL	CWA2	CWMd	PW	CWA2: CWMd
		Chiridius		2.27 ± 0.05	0.89 ± 0.02	0.86 ± 0.01	0.94 ± 0.03	1.04 ± 0.01
			obtusifrons	(2.21–2.38)	(0.86–0.92)	(0.84–0.88)	(0.90–0.98)	(1.01–1.06)
		Gaetanus		2.53 ± 0.04	0.78 ± 0.02	0.82 ± 0.02	0.92 ± 0.07	0.95 ± 0.01
			tenuispinus	(2.49–2.62)	(0.75–0.81)	(0.78–0.84)	(0.78–1.04)	(0.94–0.97)
		Gaetanus		3.08 ± 0.06	1.06 ± 0.02	1.11 ± 0.02	1.19 ± 0.04	0.96 ± 0.01
			brevispinus	(3.02–3.21)	(1.04–1.09)	(1.06–1.16)	(1.12–1.26)	(0.94–0.98)
		Aetideopsis		2.13 ± 0.07	0.85 ± 0.03	0.81 ± 0.02	0.81 ± 0.04	1.04 ± 0.01
			multiserrata	(2.05–2.29)	(0.82–0.90)	(0.79–0.86)	(0.77–0.93)	(1.03–1.07)
		Aetideopsis		3.09 ± 0.06	1.17 ± 0.02	1.14 ± 0.02	1.17 ± 0.05	1.02 ± 0.01
			rostrata	(3.00–3.16)	(1.12–1.19)	(1.10–1.17)	(1.08–1.25)	(1.01–1.04)
