# Supplementary material for: Inter-species comparison of the copepodite stage morphology, vertical distribution, and seasonal population structure of five sympatric mesopelagic aetideid copepods in the western Arctic Ocean
Source: Frontiers journal article supplement (doi:10.3389/fmars.2022.943100), 2022-08-19
Supplement: Table_5.XLSX [file Table_5.XLSX]

## Sheet: Sheet1
		Supplementary Table 5. Data on prosome length (PL), cephalosome width around the antenna (CWA2), cephalosome width around the mandible (CWMd), prosome width (PW), and CWA2: CWMd of C4F stage of five sympatric Aetideidae copepods observed for SHEBA ice station in the western Arctic Ocean. Values represent mean±sd and ranges in the parentheses.
				Length (mm)
		Species		PL	CWA2	CWMd	PW	CWA2: CWMd
		Chiridius		1.75 ± 0.03	0.71 ± 0.02	0.66 ± 0.01	0.69 ± 0.03	1.07 ± 0.02
			obtusifrons	(1.71–1.80)	(0.69–0.73)	(0.64–0.69)	(0.63–0.74)	(1.05–1.10)
		Gaetanus		1.95 ± 0.07	0.59 ± 0.03	0.61 ± 0.02	0.69 ± 0.06	0.96 ± 0.03
			tenuispinus	(1.81–2.03)	(0.55–0.64)	(0.57–0.65)	(0.60–0.77)	(0.90–0.99)
		Gaetanus		2.47 ± 0.04	0.82 ± 0.02	0.82 ± 0.02	0.86 ± 0.04	1 ± 0.02
			brevispinus	(2.41–2.55)	(0.80–0.86)	(0.78–0.85)	(0.81–0.94)	(0.96–1.03)
		Aetideopsis		1.58 ± 0.04	0.67 ± 0.02	0.62 ± 0.02	0.58 ± 0.03	1.08 ± 0.01
			multiserrata	(1.54–1.65)	(0.63–0.70)	(0.59–0.64)	(0.52–0.64)	(1.06–1.10)
		Aetideopsis		1.98 ± 0.07	0.79 ± 0.02	0.75 ± 0.03	0.71 ± 0.04	1.07 ± 0.03
			rostrata	(1.86–2.14)	(0.75–0.84)	(0.70–0.80)	(0.65–0.77)	(1.03–1.11)
