# Supplementary material for: Inter-species comparison of the copepodite stage morphology, vertical distribution, and seasonal population structure of five sympatric mesopelagic aetideid copepods in the western Arctic Ocean
Source: Frontiers journal article supplement (doi:10.3389/fmars.2022.943100), 2022-08-19
Supplement: Table_6.XLSX [file Table_6.XLSX]

## Sheet: Sheet1
		Supplementary Table 6. Data on prosome length (PL), cephalosome width around the antenna (CWA2), cephalosome width around the mandible (CWMd), prosome width (PW), and CWA2: CWMd of C4M stage of five sympatric Aetideidae copepods observed for SHEBA ice station in the western Arctic Ocean. Values represent mean±sd and ranges in the parentheses.
				Length (mm)
		Species		PL	CWA2	CWMd	PW	CWA2: CWMd
		Chiridius		1.71 ± 0.04	0.70 ± 0.01	0.67 ± 0.01	0.68 ± 0.04	1.05 ± 0.01
			obtusifrons	(1.66–1.80)	(0.68–0.73)	(0.65–0.69)	(0.63–0.73)	(1.03–1.07)
		Gaetanus		1.89 ± 0.05	0.59 ± 0.02	0.60 ± 0.02	0.67 ± 0.04	0.98 ± 0.02
			tenuispinus	(1.82–1.98)	(0.56–0.63)	(0.56–0.63)	(0.60–0.74)	(0.95–1.02)
		Gaetanus		2.44 ± 0.03	0.81 ± 0.02	0.82 ± 0.02	0.87 ± 0.03	0.99 ± 0.02
			brevispinus	(2.39–2.50)	(0.78–0.84)	(0.79–0.86)	(0.78–0.91)	(0.95–1.01)
		Aetideopsis		1.59 ± 0.03	0.66 ± 0.02	0.62 ± 0.02	0.58 ± 0.03	1.07 ± 0.02
			multiserrata	(1.54–1.63)	(0.63–0.69)	(0.60–0.64)	(0.53–0.62)	(1.04–1.10)
		Aetideopsis		2.21 ± 0.05	0.85 ± 0.03	0.81 ± 0.03	0.77 ± 0.05	1.05 ± 0.01
			rostrata	(2.12–2.29)	(0.81–0.91)	(0.77–0.86)	(0.66–0.85)	(1.03–1.08)
