# Supplementary material for: Inter-species comparison of the copepodite stage morphology, vertical distribution, and seasonal population structure of five sympatric mesopelagic aetideid copepods in the western Arctic Ocean
Source: Frontiers journal article supplement (doi:10.3389/fmars.2022.943100), 2022-08-19
Supplement: Table_7.XLSX [file Table_7.XLSX]

## Sheet: Sheet1
		Supplementary Table 7. Data on prosome length (PL), cephalosome width around the antenna (CWA2), cephalosome width around the mandible (CWMd), prosome width (PW), and CWA2: CWMd of C3 stage of five sympatric Aetideidae copepods observed for SHEBA ice station in the western Arctic Ocean. Values represent mean±sd and ranges in the parentheses.
				Length (mm)
		Species		PL	CWA2	CWMd	PW	CWA2: CWMd
		Chiridius		1.3 ± 0.02	0.53 ± 0.02	0.49 ± 0.02	0.47 ± 0.03	1.08 ± 0.02
			obtusifrons	(1.27–1.34)	(0.50–0.56)	(0.45–0.52)	(0.42–0.52)	(1.03–1.11)
		Gaetanus		1.41 ± 0.03	0.46 ± 0.02	0.47 ± 0.02	0.45 ± 0.02	0.99 ± 0.02
			tenuispinus	(1.38–1.48)	(0.44–0.49)	(0.44–0.50)	(0.43–0.51)	(0.96–1.03)
		Gaetanus		1.85 ± 0.03	0.66 ± 0.05	0.66 ± 0.05	0.66 ± 0.04	1.00 ± 0.02
			brevispinus	(1.80–1.89)	(0.63–0.81)	(0.61–0.80)	(0.60–0.78)	(0.97–1.03)
		Aetideopsis		1.2 ± 0.03	0.5 ± 0.01	0.45 ± 0.01	0.40 ± 0.02	1.11 ± 0.03
			multiserrata	(1.16–1.26)	(0.48–0.51)	(0.43–0.47)	(0.38–0.43)	(1.08–1.17)
		Aetideopsis		1.5 ± 0.05	0.63 ± 0.01	0.59 ± 0.02	0.50 ± 0.04	1.08 ± 0.02
			rostrata	(1.44–1.57)	(0.61–0.66)	(0.56–0.60)	(0.45–0.57)	(1.05–1.12)
