# Supplementary material for: Inter-species comparison of the copepodite stage morphology, vertical distribution, and seasonal population structure of five sympatric mesopelagic aetideid copepods in the western Arctic Ocean
Source: Frontiers journal article supplement (doi:10.3389/fmars.2022.943100), 2022-08-19
Supplement: Table_8.XLSX [file Table_8.XLSX]

## Sheet: Sheet1
		Supplementary Table 8. Data on prosome length (PL), cephalosome width around the antenna (CWA2), cephalosome width around the mandible (CWMd), prosome width (PW), and CWA2: CWMd of C2 stage of four sympatric Aetideidae copepods observed for SHEBA ice station in the western Arctic Ocean. Values represent mean±sd and ranges in the parentheses.
				Length (mm)
		Species		PL	CWA2	CWMd	PW	CWA2: CWMd
		Chiridius		1.04 ± 0.02	0.43 ± 0.01	0.39 ± 0.01	0.40 ± 0.01	1.09 ± 0.03
			obtusifrons	(1.01–1.1)	(0.42–0.46)	(0.38–0.42)	(0.39–0.42)	(1.06–1.13)
		Gaetanus		1.11 ± 0.02	0.37 ± 0.01	0.38 ± 0.01	0.36 ± 0.01	0.98 ± 0.01
			tenuispinus	(1.09–1.14)	(0.37–0.39)	(0.37–0.4)	(0.35–0.39)	(0.95–0.99)
		Gaetanus		1.35 ± 0.02	0.51 ± 0.01	0.50 ± 0.01	0.45 ± 0.01	1.01 ± 0.01
			brevispinus	(1.32–1.37)	(0.49–0.52)	(0.49–0.51)	(0.43–0.47)	(1.00–1.03)
		Aetideopsis		0.98 ± 0.03	0.44 ± 0.02	0.40 ± 0.01	0.35 ± 0.02	1.08 ± 0.02
			multiserrata	(0.92–1.02)	(0.41–0.47)	(0.38–0.43)	(0.30–0.38)	(1.05–1.11)
