# Supplementary material for: Inter-species comparison of the copepodite stage morphology, vertical distribution, and seasonal population structure of five sympatric mesopelagic aetideid copepods in the western Arctic Ocean
Source: Frontiers journal article supplement (doi:10.3389/fmars.2022.943100), 2022-08-19
Supplement: Table_9.XLSX [file Table_9.XLSX]

## Sheet: Sheet1
		Supplementary Table 9. Data on prosome length (PL), cephalosome width around the antenna (CWA2), cephalosome width around the mandible (CWMd), prosome width (PW), and CWA2: CWMd of C1 stage of four sympatric Aetideidae copepods observed for SHEBA ice station in the western Arctic Ocean. Values represent mean±sd and ranges in the parentheses.
				Length (mm)
		Species		PL	CWA2	CWMd	PW	CWA2: CWMd
		Chiridius		0.77 ± 0.01	0.33 ± 0.01	0.31 ± 0.01	0.31 ± 0.02	1.07 ± 0.03
			obtusifrons	(0.76–0.80)	(0.32–0.35)	(0.30–0.34)	(0.28–0.33)	(1.03–1.12)
		Gaetanus		0.81 ± 0.02	0.30 ± 0.01	0.31 ± 0.01	0.27 ± 0.02	0.98 ± 0.03
			tenuispinus	(0.79–0.85)	(0.29–0.32)	(0.29–0.31)	(0.25–0.30)	(0.93–1.05)
		Gaetanus		1.03 ± 0.02	0.41 ± 0.02	0.41 ± 0.01	0.35 ± 0.01	1.01 ± 0.03
			brevispinus	(0.99–1.06)	(0.39–0.43)	(0.38–0.42)	(0.33–0.37)	(0.94–1.04)
		Aetideopsis		0.73 ± 0.02	0.34 ± 0.02	0.32 ± 0.02	0.27 ± 0.02	1.07 ± 0.03
			multiserrata	(0.69–0.76)	(0.32–0.37)	(0.29–0.34)	(0.24–0.30)	(1.04–1.12)
