# Supplementary material for: Inter-species comparison of the copepodite stage morphology, vertical distribution, and seasonal population structure of five sympatric mesopelagic aetideid copepods in the western Arctic Ocean
Source: Frontiers journal article supplement (doi:10.3389/fmars.2022.943100), 2022-08-19
Supplement: Table_10.XLSX [file Table_10.XLSX]

## Sheet: Appendix1
	Supplementary Table 10. Standing stock of Chiridius obtusifrons in the SHEBA samples. During ice drifting, because of the changes in depth topography, the net sampling depths were greatly varied temporally between 0–100 m and 0–3500 m. Values in the parentheses indicate number of samples. Since the vertical distribution of C. obtusifrons was concentrated at mesopelagic depths (cf. Fig. 5), data f…
		Polar night/				Standing stock (ind. m-2)
	Date	Midnight sun		Depth (m)		C1	C2	C3	C4F	C4M	C5F	C5M	C6F	C6M	Total
	1997-10-27			0–2000	-4	0	0	3.7284	6.92932	2.89436	0	0.623131	15.8337	0	30.0089
	1997-11-14		PN	0–2800	-4	0	0	3	0	1	0	0	4	0	8
	1997-12-09		PN	0–3500	-4	0	0	0	1	0	3	2	5.36874	0	11.3687
	1997-12-21		PN	0–2800	-4	0	0	1	0	3	1	4	4	2	15
	1998-01-05		PN	0–2800	-6	0	3.8262	0	0	0	2.30931	0	4.68413	0	10.8196
	1998-01-19		PN	0–2800	-4	1	2	5.09521	3.09521	3	3.04761	1	14.0476	0	32.2856
	1998-02-03		PN	0–1500	-2	2	10	7	2	3	1	3	8	0	36
	1998-02-24			0–1000	-4	0	1	16.6931	6.92327	7.92327	10.6163	15.011	23.3862	5.84654	87.3997
	1998-03-04			0–1500	-6	2.97575	9.92724	17.8545	2.97575	7.43937	6.97575	13.4151	10.9272	0	72.4907
	1998-03-13			0–2000	-7	0	0	1.11111	1	0	7.3987	14.5556	12.2222	0	36.2876
	1998-04-01			0–300	-3	3.68829	4.91773	2.51909	2.48898	1.22943	3.71841	6.20739	24.679	3.68829	53.1366
	1998-04-14			0–680	-4	26	26	12	3	1	3.4587	10	18.9174	2.9174	103.293
	1998-04-20			0–200	-3	0	0	0	0	0	2	1	3	0	6
	1998-04-29			0–325	-4	19.3452	30.3996	12.4362	2.7636	1.3818	1.3818	10.2101	24.703	8.29079	110.912
	1998-05-05			0–200	-3	0	0	0	0	0	0	0	5.16661	0	5.16661
	1998-05-18			0–740	-4	23.6212	26.0128	27.6018	7.96112	13.0064	2.65371	2.65371	15.1359	1.32685	119.974
	1998-05-25			0–200	-3	0	2.25727	6.7718	4.51453	2.25727	0	2.25727	2.25727	0	20.3154
	1998-06-03			0–800	-4	3.8408	12.8027	29.671	8.1314	2.56053	2.78543	1.28027	28.8405	0	89.9126
	1998-06-09			0–200	-3	0	0	0	0	0	0	0	12	0	12
	1998-06-17			0–600	-4	4.54202	5.68095	9.09088	0	0	0	3.40994	20.4528	0	43.1766
	1998-06-30			0–200	-3	0	0	0	0	0	0	0	0	0	0
	1998-07-05			0–300	-3	1.44245	1.44245	0	0	0	0	2.8849	18.5243	0	24.2941
	1998-07-11			0–420	-4	25.2165	11.3474	5.04331	0	2.52165	3.78248	3.75922	26.3727	2.52165	80.565
	1998-07-18			0–380	-4	30.2303	13.4163	2.23605	2.23605	1.11802	0	2.23605	23.6312	4.47209	79.5761
	1998-07-24			0–100	-4	0	0	0	0	0	0	0	0	0	0
	1998-08-03		MS	0–950	-4	11.615	21.1181	17.8472	6.28383	4.17202	11.4601	7.10408	10.4042	0	90.0046
	1998-08-12		MS	0–1000	-4	6	12	31	6	4	5	7	12	2	85
	1998-08-23		MS	0–2800	-5	0	0	8	1	0	1	4	9	0	23
	1998-09-08			0–2850	-5	3.98965	7.98448	16.9741	1.99741	2.99483	5.98707	3.99224	15.9793	2.99483	62.894
	1998-09-29			0–3000	-5	3.68742	11.453	6.92186	1.92186	1.92186	1.94477	1.92186	5	0	34.7726
		PN = 6, MS = 3
