# Supplementary material for: Inter-species comparison of the copepodite stage morphology, vertical distribution, and seasonal population structure of five sympatric mesopelagic aetideid copepods in the western Arctic Ocean
Source: Frontiers journal article supplement (doi:10.3389/fmars.2022.943100), 2022-08-19
Supplement: Table_11.XLSX [file Table_11.XLSX]

## Sheet: Appendix2
	Supplementary Table 11. Standing stock of Gaetanus tenuispinus in the SHEBA samples. During ice drifting, because of the changes in depth topography, the net sampling depths were greatly varied temporally between 0–100 m and 0–3500 m. Values in the parentheses indicate number of samples. Since the vertical distribution of G. tenuispinus was concentrated at mesopelagic depths (cf. Fig. 5), data fr…
		Polar night/				Standing stock (ind. m-2)
	Date	Midnight sun		Depth (m)		C1	C2	C3	C4F	C4M	C5F	C5M	C6F	C6M	Total
	1997-10-27			0–2000	-4	0	0	3	2	0	0	0	5	0	10
	1997-11-14		PN	0–2800	-4	1	2	4	10	4	0	1	6	0	28
	1997-12-09		PN	0–3500	-4	0	0	0	1	0	1	2	6	0	10
	1997-12-21		PN	0–2800	-4	0	3	10	9	5	1	7	7	1	43
	1998-01-05		PN	0–2800	-6	0	0	7	1	4	3	1	1	0	17
	1998-01-19		PN	0–2800	-4	0	0	6	9	8	3	11	6	3	46
	1998-02-03		PN	0–1500	-2	11	26	16	27	12	33	21	6	8	160
	1998-02-24			0–1000	-4	5	25	11	14	12	71	65	22	5	230
	1998-03-04			0–1500	-6	6	51	25	15	24	45	42	10	10	228
	1998-03-13			0–2000	-7	24	101	15	22	21	75	59	15	10	342
	1998-04-01			0–300	-3	6	34	17	6	5	46	39	46	6	205
	1998-04-14			0–680	-4	78	230	121	36	51	84	83	44	32	759
	1998-04-20			0–200	-3	0	0	0	0	0	1	8	19	0	28
	1998-04-29			0–325	-4	19	77	90	11	17	44	58	56	17	389
	1998-05-05			0–200	-3	0	0	0	4	0	3	5	4	0	16
	1998-05-18			0–740	-4	78	350	338	42	42	78	77	82	56	1143
	1998-05-25			0–200	-3	0	5	7	0	0	11	25	14	0	62
	1998-06-03			0–800	-4	31	245	205	27	38	65	64	60	41	776
	1998-06-09			0–200	-3	0	0	0	0	0	4	16	44	0	64
	1998-06-17			0–600	-4	35	132	158	24	23	65	56	46	20	559
	1998-06-30			0–200	-3	0	0	0	0	0	0	0	0	0	0
	1998-07-05			0–300	-3	3	1	14	3	6	16	12	16	1	72
	1998-07-11			0–420	-4	40	39	64	19	14	20	29	35	16	276
	1998-07-18			0–380	-4	35	25	67	17	15	23	29	54	6	271
	1998-07-24			0–100	-4	0	0	0	0	0	0	0	0	0	0
	1998-08-03		MS	0–950	-4	16	31	63	23	30	14	21	42	4	244
	1998-08-12		MS	0–1000	-4	4	7	35	20	20	7	19	26	7	145
	1998-08-23		MS	0–2800	-5	8	22	20	10	17	7	13	11	3	111
	1998-09-08			0–2850	-5	1	3	3	1	1	0	0	3	0	12
	1998-09-29			0–3000	-5	0	0	1	0	0	1	1	1	0	4
		PN = 6, MS = 3
