# Supplementary material for: Inter-species comparison of the copepodite stage morphology, vertical distribution, and seasonal population structure of five sympatric mesopelagic aetideid copepods in the western Arctic Ocean
Source: Frontiers journal article supplement (doi:10.3389/fmars.2022.943100), 2022-08-19
Supplement: Table_12.XLSX [file Table_12.XLSX]

## Sheet: Appendix3
	Supplementary Table 12. Standing stock of Gaetanus brevispinus in the SHEBA samples. During ice drifting, because of the changes in depth topography, the net sampling depths were greatly varied temporally between 0–100 m and 0–3500 m. Values in the parentheses indicate number of samples. Since the vertical distribution of G. brevispinus was concentrated at mesopelagic depths (cf. Fig. 5), data fr…
		Polar night/				Standing stock (ind. m-2)
	Date	Midnight sun		Depth (m)		C1	C2	C3	C4F	C4M	C5F	C5M	C6F	C6M	Total
	1997-10-27			0–2000	-4	0	2	8	2	7	3	7	8	0	37
	1997-11-14		PN	0–2800	-4	0	14	11	6	2	9	16	14	0	72
	1997-12-09		PN	0–3500	-4	1	5	13	5	5	1	5	2	0	37
	1997-12-21		PN	0–2800	-4	0	0	0	0	0	0	0	3	1	4
	1998-01-05		PN	0–2800	-6	0	0	3	1	1	5	1	5	0	16
	1998-01-19		PN	0–2800	-4	4	1	14	5	3	7	4	5	2	45
	1998-02-03		PN	0–1500	-2	47	24	14	9	13	9	9	6	1	132
	1998-02-24			0–1000	-4	1	6	11	28	29	11	19	20	1	126
	1998-03-04			0–1500	-6	64	57	51	45	38	20	15	18	1	309
	1998-03-13			0–2000	-7	46	48	24	21	20	8	15	16	14	212
	1998-04-01			0–300	-3	0	0	0	0	0	0	0	0	0	0
	1998-04-14			0–680	-4	14	5	1	9	7	5	9	2	2	54
	1998-04-20			0–200	-3	0	0	0	0	0	0	0	0	0	0
	1998-04-29			0–325	-4	0	0	0	0	0	0	0	1	0	1
	1998-05-05			0–200	-3	0	0	0	0	0	0	0	0	0	0
	1998-05-18			0–740	-4	21	41	12	11	11	12	5	7	11	131
	1998-05-25			0–200	-3	0	0	0	0	0	0	0	0	0	0
	1998-06-03			0–800	-4	22	67	32	29	38	9	19	20	10	246
	1998-06-09			0–200	-3	0	0	0	0	0	0	0	0	0	0
	1998-06-17			0–600	-4	0	16	7	0	3	3	2	9	1	41
	1998-06-30			0–200	-3	0	0	0	0	0	0	0	0	0	0
	1998-07-05			0–300	-3	0	0	0	0	0	0	0	0	0	0
	1998-07-11			0–420	-4	0	0	0	0	0	0	0	0	0	0
	1998-07-18			0–380	-4	0	0	0	0	0	0	1	0	0	1
	1998-07-24			0–100	-4	0	0	0	0	0	0	0	0	0	0
	1998-08-03		MS	0–950	-4	8	53	50	5	19	11	32	12	1	191
	1998-08-12		MS	0–1000	-4	11	44	52	3	6	7	9	7	1	140
	1998-08-23		MS	0–2800	-5	7	30	46	4	4	4	15	7	5	122
	1998-09-08			0–2850	-5	7	45	31	6	7	17	12	13	0	138
	1998-09-29			0–3000	-5	6	20	19	3	5	2	5	8	3	71
		PN = 6, MS = 3
