# Supplementary material for: Inter-species comparison of the copepodite stage morphology, vertical distribution, and seasonal population structure of five sympatric mesopelagic aetideid copepods in the western Arctic Ocean
Source: Frontiers journal article supplement (doi:10.3389/fmars.2022.943100), 2022-08-19
Supplement: Table_13.XLSX [file Table_13.XLSX]

## Sheet: Appendix4
	Supplementary Table 13. Standing stock of Aetideopsis multiserrata in the SHEBA samples. During ice drifting, because of the changes in depth topography, the net sampling depths were greatly varied temporally between 0–100 m and 0–3500 m. Values in the parentheses indicate number of samples. Since the vertical distribution of A. multiserrata was concentrated at mesopelagic depths (cf. Fig. 5), da…
		Polar night/				Standing stock (ind. m-2)
	Date	Midnight sun		Depth (m)		C1	C2	C3	C4F	C4M	C5F	C5M	C6F	C6M	Total
	1997-10-27			0–2000	-4	0	0	0	5	0	0	0	5	0	10
	1997-11-14		PN	0–2800	-4	0	0	1	1	3	1	1	4	0	11
	1997-12-09		PN	0–3500	-4	0	0	2	3	3	3	2	4	0	17
	1997-12-21		PN	0–2800	-4	0	4	9	2	6	7	2	5	0	35
	1998-01-05		PN	0–2800	-6	1	0	2	1	1	0	0	6	0	11
	1998-01-19		PN	0–2800	-4	1	5	12	10	4	6	2	8	0	48
	1998-02-03		PN	0–1500	-2	2	17	26	19	8	16	7	12	0	107
	1998-02-24			0–1000	-4	1	12	16	17	6	16	16	28	2	114
	1998-03-04			0–1500	-6	74	92	69	24	21	27	23	24	1	355
	1998-03-13			0–2000	-7	74	129	56	18	22	18	17	29	3	366
	1998-04-01			0–300	-3	0	0	0	0	0	0	0	0	0	0
	1998-04-14			0–680	-4	41	62	24	20	5	13	8	16	3	192
	1998-04-20			0–200	-3	0	0	0	0	0	0	0	0	0	0
	1998-04-29			0–325	-4	0	0	0	0	0	0	0	0	0	0
	1998-05-05			0–200	-3	0	0	0	0	0	0	0	0	0	0
	1998-05-18			0–740	-4	29	41	53	4	8	9	11	33	9	197
	1998-05-25			0–200	-3	0	0	0	0	0	0	0	0	0	0
	1998-06-03			0–800	-4	38	47	38	15	9	12	22	51	3	235
	1998-06-09			0–200	-3	0	0	0	0	0	0	0	0	0	0
	1998-06-17			0–600	-4	24	17	11	6	5	5	8	11	0	87
	1998-06-30			0–200	-3	0	0	0	0	0	0	0	0	0	0
	1998-07-05			0–300	-3	0	0	0	0	0	0	0	0	0	0
	1998-07-11			0–420	-4	0	0	0	0	0	0	0	3	0	3
	1998-07-18			0–380	-4	0	0	0	0	0	1	0	2	0	3
	1998-07-24			0–100	-4	0	0	0	0	0	0	0	0	0	0
	1998-08-03		MS	0–950	-4	14	21	24	6	3	0	3	6	1	78
	1998-08-12		MS	0–1000	-4	0	6	6	1	2	2	6	3	0	26
	1998-08-23		MS	0–2800	-5	9	21	11	3	4	1	5	7	0	61
	1998-09-08			0–2850	-5	0	0	2	2	1	2	3	1	0	11
	1998-09-29			0–3000	-5	1	4	1	3	1	0	2	3	0	15
		PN = 6, MS = 3
