# Supplementary material for: Inter-species comparison of the copepodite stage morphology, vertical distribution, and seasonal population structure of five sympatric mesopelagic aetideid copepods in the western Arctic Ocean
Source: Frontiers journal article supplement (doi:10.3389/fmars.2022.943100), 2022-08-19
Supplement: Table_14.XLSX [file Table_14.XLSX]

## Sheet: Appendix5
	Supplementary Table 14. Standing stock of Aetideopsis rostrata in the SHEBA samples. During ice drifting, because of the changes in depth topography, the net sampling depths were greatly varied temporally between 0–100 m and 0–3500 m. Values in the parentheses indicate number of samples. Since the vertical distribution of A. rostrata was concentrated at mesopelagic depths (cf. Fig. 5), data from …
		Polar night/				Standing stock (ind. m-2)
	Date	Midnight sun		Depth (m)		C3	C4F	C4M	C5F	C5M	C6F	C6M	Total
	1997-10-27			0–2000	-4	0	2	0	0	3	4	0	9
	1997-11-14		PN	0–2800	-4	0	2	0	2	2	9	0	15
	1997-12-09		PN	0–3500	-4	0	2	1	0	5	8	0	16
	1997-12-21		PN	0–2800	-4	0	0	0	2	4	11	0	17
	1998-01-05		PN	0–2800	-6	4	4	2	7	9	27	1	54
	1998-01-19		PN	0–2800	-4	2	5	4	6	22	24	0	63
	1998-02-03		PN	0–1500	-2	1	1	0	2	4	13	0	21
	1998-02-24			0–1000	-4	0	0	2	6	9	5	0	22
	1998-03-04			0–1500	-6	21	16	24	29	31	34	0	155
	1998-03-13			0–2000	-7	33	25	28	67	43	64	2	262
	1998-04-01			0–300	-3	0	0	0	0	0	0	0	0
	1998-04-14			0–680	-4	0	0	0	0	0	0	0	0
	1998-04-20			0–200	-3	0	0	0	0	0	0	0	0
	1998-04-29			0–325	-4	0	0	0	0	0	0	0	0
	1998-05-05			0–200	-3	0	0	0	0	0	0	0	0
	1998-05-18			0–740	-4	0	0	0	0	0	0	0	0
	1998-05-25			0–200	-3	0	0	0	0	0	0	0	0
	1998-06-03			0–800	-4	0	0	1	0	0	4	0	5
	1998-06-09			0–200	-3	0	0	0	0	0	0	0	0
	1998-06-17			0–600	-4	0	0	0	0	0	0	0	0
	1998-06-30			0–200	-3	0	0	0	0	0	0	0	0
	1998-07-05			0–300	-3	0	0	0	0	0	0	0	0
	1998-07-11			0–420	-4	0	0	0	0	0	0	0	0
	1998-07-18			0–380	-4	0	0	0	0	0	0	0	0
	1998-07-24			0–100	-4	0	0	0	0	0	0	0	0
	1998-08-03		MS	0–950	-4	0	0	4	3	5	4	0	16
	1998-08-12		MS	0–1000	-4	0	0	0	3	1	4	0	8
	1998-08-23		MS	0–2800	-5	7	2	5	0	8	18	0	40
	1998-09-08			0–2850	-5	0	0	4	6	11	11	3	35
	1998-09-29			0–3000	-5	0	0	0	2	2	6	0	10
		PN = 6, MS = 3
